# Supplementary material for: Characterization Of Age-Related Immune Features After Autologous NK Cell Infusion
Source: Research Square preprint supplement (doi:10.21203/rs.3.rs-511601/v1), 2021-05-21
Supplement: Supplementary file 1 [file 3db0f32c41aae174240e149d.docx]

| **Supplementary Table 1: Baseline characteristics.** | |
| --- | --- |
| **Subjects** (n) | 32 |
| **Age range at infusion** (years) | 45-55 |
| **Weight** (kg , mean±SD) | 64.01±10.95 |
| **Gender** |  |
| Male (n) | 15 |
| Female (n) | 17 |
| **Total Cell No.** (×10^9) |  |
| Mean±SD | 5.36±0.69 |
| 95% CI | 5.06-5.65 |
| Min~Max | 4.20-6.70 |
| **NK cell purity** (%) |  |
| Mean±SD | 54.73±15.84 |
| 95% CI | 48.03-61.42 |
| Min~Max | 28.0-86.0 |

| **Supplementary Table 2: Adverse events after autologous NK cell infusion.** | | |  | |
| --- | --- | --- | --- | --- |
| **Adverse event** | Cases | Time | | Gender | |
| **Skin rashes** | 0 | 0 | | 0 | |
| **Local bleeding, infection** | 0 | 0 | | 0 | |
| **Fever and chills** | 0 | 0 | | 0 | |
| **Infection** | 0 | 0 | | 0 | |
| **Difficult breathing** | 0 | 0 | | 0 | |
| **Nausea and vomiting** | 0 | 0 | | 0 | |
| **Low blood cell count** | 0 | 0 | | 0 | |
| **Agrypnia** | 1 | 1st week | | F | |
| **Dizziness** | 1 | 1-2 weeks | | F | |
| **Fatigue** |  |  | |  | |
| mild | 1 | 1st week | | F | |
| media | 1 | 1-2 weeks | | F | |
| severe | 0 | 0 | | 0 | |
| **others** | **0** | **0** | | **0** | |
